# Supplementary material for: Improved survival after acute graft-versus-host disease diagnosis in the modern era
Source: PubMed Central journal article supplement — Haematologica. 2017 May;102(5):958–66. doi: 10.3324/haematol.2016.156356 (PMC5477615; doi:10.3324/haematol.2016.156356), 2017-05
Supplement: 2016.156356.KHOURY_SUPPL.pdf [file 2016.156356.KHOURY_SUPPL.pdf]

## Improved survival after acute graft-versus-host disease diagnosis in the modern era

Hanna J. Khoury,<sup>1</sup> Tao Wang,<sup>2,3</sup> Michael T. Hemmer,<sup>2</sup> Daniel Couriel,<sup>4</sup> Amin Alousi,<sup>5</sup> Corey Cutler,<sup>6</sup> Mahmoud Aljurf,<sup>7</sup> Joseph H. Antin,<sup>6</sup> Mouhab Ayas,<sup>7</sup> Mino Battiwalla,<sup>8</sup> Jean-Yves Cahn,<sup>9</sup> Mitchell Cairo,<sup>10</sup> Yi-Bin Chen,<sup>11</sup> Robert Peter Gale,<sup>12</sup> Shahrukh Hashmi,<sup>13,14</sup> Robert J. Hayashi,<sup>15</sup> Madan Jagasia,<sup>16</sup> Mark Juckett,<sup>17</sup> Rammurti T. Kamble,<sup>18</sup> Mohamed Kharfan-Dabaja,<sup>19</sup> Mark Litzow,<sup>13</sup> Navneet Majhail,<sup>20</sup> Alan Miller,<sup>18</sup> Taiga Nishihori,<sup>19</sup> Muna Qayed,<sup>21</sup> Helene Schoemans,<sup>22</sup> Harry C. Schouten,<sup>23</sup> Gerard Socie,<sup>24</sup> Jan Storek,<sup>25</sup> Leo Verdonck,<sup>26</sup> Ravi Vij,<sup>27</sup> William A. Wood,<sup>28</sup> Lolie Yu,<sup>29</sup> Rodrigo Martino,<sup>30</sup> Matthew Carabasi,<sup>31</sup> Christopher Dandoy,<sup>32</sup> Usama Gergis,<sup>33</sup> Peiman Hematti,<sup>17</sup> Melham Solh,<sup>34</sup> Kareem Jamani,<sup>25</sup> Leslie Lehmann,<sup>35</sup> Bipin Savani,<sup>16</sup> Kirk R. Schultz,<sup>36</sup> Baldeep M. Wirk,<sup>37</sup> Stephen Spellman,<sup>38</sup> Mukta Arora<sup>39</sup> and Joseph Pidala<sup>19</sup>

<sup>1</sup>Department of Hematology and Medical Oncology, Winship Cancer Institute of Emory University, Atlanta, GA, USA; <sup>2</sup>CIBMTR (Center for International Blood and Marrow Transplant Research), Department of Medicine, Medical College of Wisconsin, Milwaukee, WI, USA; <sup>3</sup>Division of Biostatistics, Institute for Health and Society, Medical College of Wisconsin, Milwaukee, WI, USA; <sup>4</sup>Utah Blood and Marrow Transplant Program-Adults, Salt Lake City, UT, USA; <sup>5</sup>Department of Stem Cell Transplantation, Division of Cancer Medicine, The University of Texas MD Anderson Cancer Center, Houston, TX, USA; <sup>6</sup>Center for Hematologic Oncology, Department of Medical Oncology, Dana-Farber Cancer Institute, Boston, MA, USA; <sup>7</sup>Department of Pediatric Hematology Oncology, King Faisal Specialist Hospital Center & Research, Riyadh, Saudi Arabia; <sup>8</sup>Hematology Branch, National Heart, Lung and Blood Institute-NIH, Bethesda, MD, USA; <sup>9</sup>Department of Hematology, University Hospital, Grenoble, France; <sup>10</sup>Division of Pediatric Hematology, Oncology and Stem Cell Transplantation, Department of Pediatrics, New York Medical College, Valhalla, NY, USA; <sup>11</sup>Division of Hematology/Oncology, Massachusetts General Hospital, Boston, MA, USA; <sup>12</sup>Hematology Research Centre, Division of Experimental Medicine, Department of Medicine, Imperial College London, UK; <sup>13</sup>Department of Internal Medicine, Mayo Clinic Rochester, MN, USA; <sup>14</sup>Department of Oncology, King Faisal Specialist Hospital Center & Research, Riyadh, Saudi Arabia; <sup>15</sup>Division of Pediatric Hematology/Oncology, Department of Pediatrics, Washington University School of Medicine in St. Louis, MO, USA; <sup>16</sup>Division of Hematology/Oncology, Vanderbilt University Medical Center, Nashville, TN, USA; <sup>17</sup>Division of Hematology/Oncology/Bone Marrow Transplantation, Department of Medicine, University of Wisconsin Hospital and Clinics, Madison, WI, USA; <sup>18</sup>Division of Hematology and Oncology, Center for Cell and Gene Therapy, Baylor College of Medicine, Houston, TX, USA; <sup>19</sup>Department of Blood and Marrow Transplantation, H. Lee Moffitt Cancer Center and Research Institute, Tampa, FL, USA; <sup>20</sup>Blood & Marrow Transplant Program, Cleveland Clinic Taussig Cancer Institute, Cleveland, OH, USA; <sup>21</sup>Department of Pediatrics, Emory University School of Medicine, Atlanta, GA, USA; <sup>22</sup>University Hospital of Leuven, Belgium; <sup>23</sup>Department of Hematology, Academische Ziekenhuis, Maastricht, the Netherlands; <sup>24</sup>Department of Hematology, Hopital Saint Louis, Paris, France; <sup>25</sup>Department of Medicine, University of Calgary, AB, Canada; <sup>26</sup>Isala Clinics Zwolle, the Netherlands; <sup>27</sup>Division of Hematology and Oncology, Washington University School of Medicine, St. Louis, MO, USA; <sup>28</sup>Division of Hematology/Oncology, Department of Medicine, University of North Carolina, Chapel Hill, NC, USA; <sup>29</sup>Division of Hematology/Oncology & HSCT, The Center for Cancer and Blood Disorders, Children's Hospital/Louisiana State University Medical Center, New Orleans, LA, USA; <sup>30</sup>Division of Clinical Hematology, Hospital de la Santa Creu I Sant Pau, Barcelona, Spain; <sup>31</sup>Thomas Jefferson University Hospital, Philadelphia, PA, USA; <sup>32</sup>Cincinnati Children's Hospital Medical Center, OH, USA; <sup>33</sup>Hematologic Malignancies & Bone Marrow Transplant, Department of Medical Oncology, New York Presbyterian Hospital/Weill Cornell Medical Center, NY, USA; <sup>34</sup>The Blood and Marrow Transplant Group of Georgia, Northside Hospital, Atlanta, GA, USA; <sup>35</sup>Dana Farber Cancer Institute/ Boston Children's Hospital, MA, USA; <sup>36</sup>Department of Pediatric Hematology, Oncology and Bone Marrow Transplant, British Columbia's Children's Hospital, The University of British Columbia, Vancouver, BC, Canada; <sup>37</sup>Division of Bone Marrow Transplant, Seattle Cancer Care Alliance, WA, USA; <sup>38</sup>CIBMTR (Center for International Blood and Marrow Transplant Research), National Marrow Donor Program/Be the Match, Minneapolis, MN, USA and <sup>39</sup>Division of Hematology, Oncology, and Transplantation, Department of Medicine, University of Minnesota Medical Center, Minneapolis, MN, USA

©2017 Ferrata Storti Foundation. This is an open-access paper. doi:10.3324/haematol.2016.156356

Received: September 16, 2016.

Accepted: March 7, 2017.

Pre-published: March 16, 2017.

Correspondence: joseph.pidala@moffitt.org

**Supplementary table 1:** Characteristics of aGVHD-related variables for patients who developed aGVHD Grade II receiving cyclosporine-based GVHD prophylaxis

| Variable                             | 1999-2001  | 2002-2005  | 2006-2012  |
|--------------------------------------|------------|------------|------------|
| <b>Number of CsA patients*</b>       | <b>163</b> | <b>260</b> | <b>136</b> |
| aGVHD organ involvement              |            |            |            |
| Skin + Liver + UGI + LGI             | 1 (<1)     | 1 (<1)     | 1 (<1)     |
| Skin + Liver + UGI                   | 2 (1)      | 10 (4)     | 1 (<1)     |
| Skin + Liver + LGI                   | 14 (9)     | 6 (2)      | 2 (1)      |
| Skin + UGI + LGI                     | 1 (<1)     | 6 (2)      | 15 (11)    |
| Skin + UGI                           | 7 (4)      | 44 (17)    | 21 (15)    |
| Skin + LGI                           | 43 (26)    | 36 (14)    | 20 (15)    |
| Skin + Liver                         | 18 (11)    | 15 (6)     | 9 (7)      |
| Liver + UGI + LGI                    | 0          | 1 (<1)     | 0          |
| Liver + UGI                          | 1 (<1)     | 3 (1)      | 0          |
| Liver + LGI                          | 3 (2)      | 1 (<1)     | 0          |
| UGI + LGI                            | 1 (<1)     | 1 (<1)     | 10 (7)     |
| Skin                                 | 47 (29)    | 88 (34)    | 32 (24)    |
| UGI                                  | 11 (7)     | 32 (12)    | 14 (10)    |
| LGI                                  | 13 (8)     | 13 (5)     | 8 (6)      |
| Liver                                | 1 (<1)     | 3 (1)      | 3 (2)      |
| aGVHD treatment (summary categories) |            |            |            |
| Steroids + ATG +- others             | 2 (1)      | 8 (3)      | 0          |
| Steroids + MAB +- others             | 6 (4)      | 15 (6)     | 8 (6)      |
| Steroids +- others                   | 147 (90)   | 221 (85)   | 117 (86)   |
| Missing                              | 8 (5)      | 16 (6)     | 11 (8)     |
| aGVHD treatment (detail)             |            |            |            |
| Steroids + ATG +- others             | 2 (1)      | 8 (3)      | 0          |
| Steroids + MAB +- others             | 6 (4)      | 15 (6)     | 8 (6)      |
| Steroids only                        | 19 (12)    | 14 (5)     | 20 (15)    |
| Steroids + CsA only                  | 87 (53)    | 137 (53)   | 38 (28)    |
| Steroids + CsA + MMF +- others       | 8 (5)      | 25 (10)    | 24 (18)    |
| Steroids + CsA + MTX +- others       | 5 (3)      | 4 (2)      | 3 (2)      |
| Steroids + CsA + others              | 19 (12)    | 26 (10)    | 16 (12)    |
| Steroids + Tac only                  | 3 (2)      | 9 (3)      | 0          |
| Steroids + Tac + MMF +- others       | 0          | 3 (1)      | 5 (4)      |
| Steroids + Tac + others              | 0          | 0          | 1 (<1)     |
| Steroids + others                    | 6 (4)      | 3 (1)      | 10 (7)     |
| Missing                              | 8 (5)      | 16 (6)     | 11 (8)     |

| Variable              | 1999-2001 | 2002-2005 | 2006-2012 |
|-----------------------|-----------|-----------|-----------|
| <b>Cause of death</b> |           |           |           |
| Number of deaths      | 104       | 153       | 86        |
| Primary disease       | 46 (44)   | 70 (46)   | 44 (51)   |
| New malignancy        | 4 (4)     | 2 (1)     | 0         |
| GVHD                  | 7 (7)     | 20 (13)   | 9 (10)    |
| IPN                   | 8 (8)     | 10 (7)    | 2 (2)     |
| Infection             | 14 (13)   | 23 (15)   | 11 (13)   |
| Organ failure         | 14 (13)   | 13 (8)    | 14 (16)   |
| Other cause           | 10 (10)   | 10 (7)    | 6 (7)     |
| Missing               | 1 (<1)    | 5 (3)     | 0         |

\*: Includes n=46 patients who received CsA & Tac as a part of GVHD prophylaxis.

**Supplementary table 2:** Characteristics of aGVHD-related variables for patients who developed aGVHD Grade II receiving tacrolimus-based GVHD prophylaxis

| Variable                             | 1999-2001 | 2002-2005  | 2006-2012  |
|--------------------------------------|-----------|------------|------------|
| <b>Number of Tac patients</b>        | <b>54</b> | <b>238</b> | <b>741</b> |
| aGVHD organ involvement              |           |            |            |
| Skin + Liver + UGI + LGI             | 0         | 2 (<1)     | 8 (1)      |
| Skin + Liver + UGI                   | 0         | 1 (<1)     | 4 (<1)     |
| Skin + Liver + LGI                   | 0         | 3 (1)      | 4 (<1)     |
| Skin + UGI + LGI                     | 1 (2)     | 4 (2)      | 93 (13)    |
| Skin + UGI                           | 4 (7)     | 38 (16)    | 119 (16)   |
| Skin + LGI                           | 11 (20)   | 35 (15)    | 105 (14)   |
| Skin + Liver                         | 3 (6)     | 6 (3)      | 11 (1)     |
| Liver + UGI + LGI                    | 0         | 0          | 4 (<1)     |
| Liver + UGI                          | 0         | 0          | 2 (<1)     |
| Liver + LGI                          | 0         | 1 (<1)     | 2 (<1)     |
| UGI + LGI                            | 1 (2)     | 4 (2)      | 86 (12)    |
| Skin                                 | 29 (54)   | 90 (38)    | 144 (19)   |
| UGI                                  | 0         | 36 (15)    | 99 (13)    |
| LGI                                  | 5 (9)     | 18 (8)     | 52 (7)     |
| Liver                                | 0         | 0          | 8 (1)      |
| aGVHD treatment (summary categories) |           |            |            |
| Steroids + ATG +- others             | 3 (6)     | 7 (3)      | 9 (1)      |
| Steroids + MAB +- others             | 5 (9)     | 22 (9)     | 52 (7)     |
| Steroids +- others                   | 45 (83)   | 202 (85)   | 645 (87)   |
| Missing                              | 1 (2)     | 7 (3)      | 35 (5)     |
| aGVHD treatment (detail)             |           |            |            |
| Steroids + ATG +- others             | 3 (6)     | 7 (3)      | 9 (1)      |
| Steroids + MAB +- others             | 5 (9)     | 22 (9)     | 52 (7)     |
| Steroids only                        | 4 (7)     | 20 (8)     | 87 (12)    |
| Steroids + CsA                       | 0         | 1 (<1)     | 3 (<1)     |
| Steroids + CsA + MMF +- others       | 0         | 2 (<1)     | 6 (<1)     |
| Steroids + CsA + others              | 1 (2)     | 2 (<1)     | 4 (<1)     |
| Steroids + Tac                       | 21 (39)   | 99 (42)    | 207 (28)   |
| Steroids + Tac + MMF +- others       | 6 (11)    | 48 (20)    | 124 (17)   |
| Steroids + Tac + MTX +- others       | 1 (2)     | 3 (1)      | 15 (2)     |
| Steroids + Tac + others              | 6 (11)    | 19 (8)     | 147 (20)   |
| Steroids + others                    | 6 (11)    | 8 (3)      | 52 (7)     |
| Missing                              | 1 (2)     | 7 (3)      | 35 (5)     |

Cause of death

|                  |         |         |          |
|------------------|---------|---------|----------|
| Number evaluable | 39      | 156     | 373      |
| Primary disease  | 17 (44) | 73 (47) | 193 (52) |
| New malignancy   | 0       | 4 (3)   | 5 (1)    |
| GVHD             | 1 (3)   | 18 (12) | 52 (14)  |
| IPN              | 4 (10)  | 11 (7)  | 11 (3)   |
| Infection        | 7 (18)  | 15 (10) | 41 (11)  |
| Organ failure    | 8 (21)  | 14 (9)  | 38 (10)  |
| Other cause      | 2 (5)   | 17 (11) | 18 (5)   |
| Missing          | 0       | 4 (3)   | 15 (4)   |

---

**Supplemental table 3:** Characterization of included acute GVHD cases for both cyclosporine and tacrolimus groups according to refined Minnesota risk classification

| Variable                               | Cyclosporine |            |            | Tacrolimus |            |             |
|----------------------------------------|--------------|------------|------------|------------|------------|-------------|
|                                        | 1999-2001    | 2002-2005  | 2006-2012  | 1999-2001  | 2002-2005  | 2006-2012   |
| <b>Number of overall patients</b>      | <b>359</b>   | <b>473</b> | <b>245</b> | <b>132</b> | <b>472</b> | <b>1163</b> |
| aGVHD grade                            |              |            |            |            |            |             |
| II                                     | 163 (45)     | 260 (55)   | 136 (56)   | 54 (41)    | 238 (50)   | 741 (64)    |
| III                                    | 140 (39)     | 151 (32)   | 72 (29)    | 46 (35)    | 152 (32)   | 286 (25)    |
| IV                                     | 56 (16)      | 62 (13)    | 37 (15)    | 32 (24)    | 82 (17)    | 136 (12)    |
| Standard/High Risk aGVHD               |              |            |            |            |            |             |
| Standard Risk                          | 198 (55)     | 287 (61)   | 151 (62)   | 73 (55)    | 290 (61)   | 741 (64)    |
| High Risk                              | 161 (45)     | 186 (39)   | 94 (38)    | 59 (45)    | 182 (39)   | 422 (36)    |
| <b>Number of grade II patients</b>     | <b>163</b>   | <b>260</b> | <b>136</b> | <b>54</b>  | <b>238</b> | <b>741</b>  |
| Standard/High Risk aGVHD               |              |            |            |            |            |             |
| Standard Risk                          | 140 (86)     | 231 (89)   | 123 (90)   | 53 (98)    | 229 (96)   | 635 (86)    |
| High Risk                              | 23 (14)      | 29 (11)    | 13 (10)    | 1 (2)      | 9 (4)      | 106 (14)    |
| <b>Number of grade III-IV patients</b> | <b>196</b>   | <b>213</b> | <b>109</b> | <b>78</b>  | <b>234</b> | <b>422</b>  |
| aGVHD grade                            |              |            |            |            |            |             |
| III                                    | 140 (71)     | 151 (71)   | 72 (66)    | 46 (59)    | 152 (65)   | 286 (68)    |
| IV                                     | 56 (29)      | 62 (29)    | 37 (34)    | 32 (41)    | 82 (35)    | 136 (32)    |
| Standard/High Risk aGVHD               |              |            |            |            |            |             |
| Standard Risk                          | 58 (30)      | 56 (26)    | 28 (26)    | 20 (26)    | 61 (26)    | 106 (25)    |
| High Risk                              | 138 (70)     | 157 (74)   | 81 (74)    | 58 (74)    | 173 (74)   | 316 (75)    |
