# Supplementary material for: Improved survival after acute graft-versus-host disease diagnosis in the modern era
Source: PubMed Central journal article supplement — Haematologica. 2017 May;102(5):958–66. doi: 10.3324/haematol.2016.156356 (PMC5477615; doi:10.3324/haematol.2016.156356), 2017-05
Supplement: 2016_156356-Disclosures_and_Contributions.pdf [file 2016_156356-Disclosures_and_Contributions.pdf]

Haematologica  
HAEMATOL/2016/156356  
Version 3

Improved survival after acute graft vs host disease diagnosis in the  
modern era

Hanna J. Khoury, Tao Wang, Michael T. Hemmer, Daniel Couriel, Amin Alousi, Corey Cutler, Mahmoud Aljurf, Joseph H. Antin, Mouhab Ayas, Minoo Battiwalla, Jean-Yves Cahn, Mitchell Cairo, Yi-Bin Chen, Robert Peter Gale, Shahrukh Hashmi, Robert J. Hayashi, Madan Jagasia, Mark Juckett, Rammurti T Kamble, Mohamed Kharfan-Dabaja, Mark Litzow, Navneet Majhail, Alan Miller, Taiga Nishihori, Muna Qayed, Helene Schoemans, Harry C. Schouten, Gérard Socié, Jan Storek, Leo Verdonck, Ravi Vij, William A. Wood, Lolie Yu, Rodrigo Martino, Matthew Carabasi, Christopher Dandoy, Usama Gergis, Peiman Hematti, Melham Solh, Kareem Jamani, Leslie Lehmann, Bipin Savani, Kirk R. Schultz, Baldeep M. Wirk, Stephen Spellman, Mukta Arora, and Joseph Pidala

Disclosures: No Conflict of interest to disclose

Contributions: HJK designed research and wrote the manuscript. TW performed statistical analysis and analyzed and interpreted data. MTH analyzed and interpreted data. DC and AA designed research, performed research and analyzed and interpreted data. CC designed research and performed research. MA, JA, MA, MB, JC, MC, YC, RPG, SH, RH, M Jagasia, M Juckett, RK, MKD, ML, NM, AM, TN, MQ, H Schoemans, H Schouten, GS, JS, LV, RV, WW, LY, RB, MC, CD, UG, PH, SM, KJ, LL, BS, KS and MW performed research. SS and MA designed research, performed research and analyzed and interpreted data. JP designed research, performed research, analyzed and interpreted data, and wrote the manuscript.
