# Supplementary material for: Improved survival after acute graft-versus-host disease diagnosis in the modern era
Source: PubMed Central journal article supplement — Haematologica. 2017 May;102(5):958–66. doi: 10.3324/haematol.2016.156356 (PMC5477615; doi:10.3324/haematol.2016.156356), 2017-05
Supplement: HAEMATOL-2016-156356v3-Khoury_01-01-01.pdf [file HAEMATOL-2016-156356v3-Khoury_01-01-01.pdf]

# Improved survival after acute graft vs host disease diagnosis in the modern era

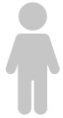

2,905

- 56% Acute myeloid leukemia
- 30% Acute lymphoblastic leukemia
- 14% Myelodysplastic syndrome

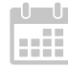

Transplant received between 1999 and 2012

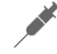

24% sibling vs 76% unrelated donor

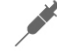

66% blood vs 34% bone marrow

Developed grades II-IV acute graft vs. host disease

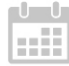

1999-2001

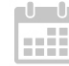

2002-2005

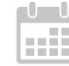

2006-2010

patients with grades II-IV acute graft vs. host disease

n=497

n=962

n=1,446

% with grades III-IV acute graft vs. host disease over time

56%

47%

37%

( $p < 0.001$ )

overall survival and treatment-related mortality improved significantly over time

deaths from organ failure and infection declined over time
